# Supplementary material for: Health Professions Digital Education on Antibiotic Management: Systematic Review and Meta-Analysis by the Digital Health Education Collaboration
Source: PubMed Central journal article supplement (PMC6746065; doi:10.2196/14984), 2019-09-12
Supplement: jmir_v21i9e14984_app4.pdf [file jmir_v21i9e14984_app4.pdf]

| Multimedia Appendix 4: Results of the included studies |                                                                                                                                    |                                                                                     |                                                                                  |                                                                   |                                                                                                                                                         |                                    |                                                                                                                                                                                                                                                                                                                                                  |                                                                                                                                                                                                                                                                                                                        |                                                                                                                                                                                                                                                                              |
|--------------------------------------------------------|------------------------------------------------------------------------------------------------------------------------------------|-------------------------------------------------------------------------------------|----------------------------------------------------------------------------------|-------------------------------------------------------------------|---------------------------------------------------------------------------------------------------------------------------------------------------------|------------------------------------|--------------------------------------------------------------------------------------------------------------------------------------------------------------------------------------------------------------------------------------------------------------------------------------------------------------------------------------------------|------------------------------------------------------------------------------------------------------------------------------------------------------------------------------------------------------------------------------------------------------------------------------------------------------------------------|------------------------------------------------------------------------------------------------------------------------------------------------------------------------------------------------------------------------------------------------------------------------------|
| Study ID (Author Year), Study Design, Country          | Intervention Type                                                                                                                  | Population (N)                                                                      | Field of Study                                                                   | Knowledge                                                         | Clinical practice improvement                                                                                                                           | Healthcare Professionals' Attitude | Patient-related outcomes                                                                                                                                                                                                                                                                                                                         | Economic outcome(s)                                                                                                                                                                                                                                                                                                    | Conclusion                                                                                                                                                                                                                                                                   |
| Bochicchio 2006, RCT, USA                              | I: Mobile digital education<br><br>C: Traditional education (Usual practice)                                                       | 12 primary care physicians                                                          | Antibiotic decision management guide                                             | Post-intervention mean score on 50 items MCQ, SMD=1.3 [0.00, 2.6] | N/A                                                                                                                                                     | N/A                                | N/A                                                                                                                                                                                                                                                                                                                                              | N/A                                                                                                                                                                                                                                                                                                                    | <b>Knowledge:</b><br>Mobile digital education > Traditional education                                                                                                                                                                                                        |
| Butler 2012, RCT, UK                                   | I: Online blended education (Online digital education plus traditional education)<br><br>C: Traditional education (Usual practice) | 68 practices, 263 primary care physicians and 480,000 patients (approximate number) | Multifaceted educational program to reduce antibiotic dispensing in primary care | N/A                                                               | Reported a reduction in the rate of total oral antibiotic dispensing for the study year in online blended education (4.2%, 95% CI 0.6% to 7.7%, P=0.02) | N/A                                | No difference in post-intervention hospital admission rate (MD=-1.9%, 95% CI: -13.2 to 8.2, P=0.72) and re-consultation rate at seven day post-intervention median scores (MD=-0.65 (95% CI -1.69 to 0.55, P=0.446) between the intervention (i.e. online blended digital education) and the traditional education groups (i.e. usual practice). | Mean cost of the programme (intervention) was £2923 per practice (SD £1187). There was a 5.5% (-0.4% to 11.4%) reduction in the cost of dispensed antibiotics in the intervention group compared with the control group which was equivalent to a reduction of about £830 a year for an average intervention practice. | <b>Clinical practice improvement:</b><br>Online blended education > Traditional education<br><br><b>Patient-related outcomes:</b><br>Online blended education = Traditional education<br><br><b>Economic outcome(s):</b><br>Online blended education > Traditional education |

|                                              |                                                                                       |                                                            |                                                        |                                                                     |                                                                                                                                     |                                                                                                                                                                                                             |                                                                                                                                                                                                            |                                                                                                                                                                                                                                                                      |                                                                                                                                                                                                                                                                                                                              |
|----------------------------------------------|---------------------------------------------------------------------------------------|------------------------------------------------------------|--------------------------------------------------------|---------------------------------------------------------------------|-------------------------------------------------------------------------------------------------------------------------------------|-------------------------------------------------------------------------------------------------------------------------------------------------------------------------------------------------------------|------------------------------------------------------------------------------------------------------------------------------------------------------------------------------------------------------------|----------------------------------------------------------------------------------------------------------------------------------------------------------------------------------------------------------------------------------------------------------------------|------------------------------------------------------------------------------------------------------------------------------------------------------------------------------------------------------------------------------------------------------------------------------------------------------------------------------|
| Chen 2014, cRCT, China                       | I: Mobile digital education<br><br>C: Traditional education (Traditional CME program) | 100 practices and 479 primary care physicians              | Management of upper respiratory infection              | Post-intervention mean score on 10 items MCQ, SMD=1.09 [0.96, 1.23] | Antibiotic prescribing rate for intervention group in comparison to the control (RR=1.02, 95% CI: 0.94 to 1.1, P=0.63).             | One-third of the participants in the intervention group reported that they frequently adopted the recommendations in their clinical decision-making and 95% wanted to continue receiving the text messages. | N/A                                                                                                                                                                                                        | Total cost in the intervention group = <2 Yuan (US \$0.32) per health worker (i.e. cost on text messages)<br><br>Total cost in traditional education group = 560 Yuan (US \$89.96) per health worker (for printed materials, accommodation and transportation costs) | <b>Knowledge:</b> Mobile digital education > Traditional education<br><br><b>Clinical practice improvement:</b> Mobile digital education = Traditional education<br><br><b>Healthcare Professionals' Attitude:</b> (no comparative data)<br><br><b>Economic outcome(s):</b> Mobile digital education > Traditional education |
| Dekker 2018, cRCT, the Netherlands           | I: Online digital education<br><br>C: Traditional education (Usual practice)          | 35 practices, 75 primary care physicians and 1009 patients | Antibiotic prescription in acute respiratory infection | N/A                                                                 | Antibiotic prescribing rate was lower in the online digital education compared to traditional education: RR=0.65 (95% CI 0.46-0.91) | N/A                                                                                                                                                                                                         | Re-consultation rate for children within the same disease episode was lower in the intervention group receiving online digital education compared to traditional education (RR=0.66, 95% CI 0.38 to 1.16). | N/A                                                                                                                                                                                                                                                                  | <b>Clinical practice improvement:</b> Online digital education > traditional education (usual practice)<br><br><b>Patient-related outcomes:</b> Online digital education = traditional education (usual practice)                                                                                                            |
| Legare 2012, cRCT, Canada<br><br>Couet 2014, | I: Online blended education (Online digital education plus                            | 9 practices, 149 primary care physicians and 359 patients  | Antibiotic prescription in acute respiratory infection | N/A                                                                 | N/A                                                                                                                                 | N/A                                                                                                                                                                                                         | Patients deciding to use antibiotics for acute respiratory infections compared to traditional education                                                                                                    | N/A                                                                                                                                                                                                                                                                  | <b>Patient-related outcomes:</b> Online blended education = Traditional education                                                                                                                                                                                                                                            |

|                        |                                                                              |                                              |                                                      |     |                                                                                                                                                                                 |     |                                                                                                                                                                                                                                                                                                                                                                   |     |                                                                                           |
|------------------------|------------------------------------------------------------------------------|----------------------------------------------|------------------------------------------------------|-----|---------------------------------------------------------------------------------------------------------------------------------------------------------------------------------|-----|-------------------------------------------------------------------------------------------------------------------------------------------------------------------------------------------------------------------------------------------------------------------------------------------------------------------------------------------------------------------|-----|-------------------------------------------------------------------------------------------|
| cRCT, Canada           | traditional education)<br><br>C: Traditional education (Usual practice)      |                                              |                                                      |     |                                                                                                                                                                                 |     | (RR=0.48, 95% CI 0.34 to 0.68).<br><br>Decisional regret: SMD=0.25 (95% CI -1.07, 1.57)<br><br>Intention to engage in shared decision-making: SMD= 0.16 (95% CI -1.16, 1.47)<br><br>Quality of life*: SMD=0.04 (95% CI -1.27, 1.36)<br><br>Adherence to the decision: SMD=-0.82 (95% CI -2.23, 0.59)<br><br>Repeated consultations: SMD=0.80 (95% CI -0.60, 2.20) |     |                                                                                           |
| Meeker 2016, cRCT, USA | I: Online digital education<br><br>C: Traditional education (Usual practice) | 47 practices and 248 primary care physicians | Antibiotic prescription among primary care practices | N/A | Reduction in antibiotic prescribing rates in the intervention group compared to traditional education (Difference in mean change score: -5.2% [95%CI, -6.9%to -1.6%]; P<0.001). | N/A | N/A                                                                                                                                                                                                                                                                                                                                                               | N/A | <b>Clinical practice improvement:</b><br>Online digital education > traditional education |
| McNulty 2018, cRCT, UK | I: Online blended education                                                  | 150 practices and 166                        | Antibiotic dispensing in                             | N/A | Antibiotics Dispensing rate ratio                                                                                                                                               | N/A | N/A                                                                                                                                                                                                                                                                                                                                                               | N/A | <b>Clinical practice improvement:</b>                                                     |

|                                                                                                                                                                                                           |                                                                                                                                                                                                                                                              |                                 |                                                        |     |                                                                                                                                                                                                                                                                                                                                                              |     |                                                                                                                                                                                                                                                                                                                                                                                                                                               |                                                                                                                                                        |                                                                                                                                                                                                                                                                                                                                             |
|-----------------------------------------------------------------------------------------------------------------------------------------------------------------------------------------------------------|--------------------------------------------------------------------------------------------------------------------------------------------------------------------------------------------------------------------------------------------------------------|---------------------------------|--------------------------------------------------------|-----|--------------------------------------------------------------------------------------------------------------------------------------------------------------------------------------------------------------------------------------------------------------------------------------------------------------------------------------------------------------|-----|-----------------------------------------------------------------------------------------------------------------------------------------------------------------------------------------------------------------------------------------------------------------------------------------------------------------------------------------------------------------------------------------------------------------------------------------------|--------------------------------------------------------------------------------------------------------------------------------------------------------|---------------------------------------------------------------------------------------------------------------------------------------------------------------------------------------------------------------------------------------------------------------------------------------------------------------------------------------------|
|                                                                                                                                                                                                           | (Online digital education plus traditional education)<br><br>C: Traditional education (Usual practice)                                                                                                                                                       | primary care physicians         | primary care                                           |     | 0.973, 95% CI 0.945 to 1.001, P=0.06)                                                                                                                                                                                                                                                                                                                        |     |                                                                                                                                                                                                                                                                                                                                                                                                                                               |                                                                                                                                                        | Online blended education = traditional education (reduction in antibiotic dispensing)                                                                                                                                                                                                                                                       |
| Little 2013, cRCT, six European countries (England, Wales, Belgium, the Netherlands, Spain and Poland)<br><br>Yardley 2013, cRCT, six European countries<br><br>Oppong 2018, cRCT, six European countries | Ia: Online digital education (CRP training)<br><br>Ib: Online digital education (enhanced-communication training)<br><br>Ic: Online digital education (combined training of CRP and enhanced-communication)<br><br>C: Traditional education (Usual practice) | 246 practices and 4264 patients | Antibiotic prescription in acute respiratory infection | N/A | Antibiotic prescribing rate was lower with CRP training compared to traditional education: RR=0.53, 95% CI 0.36 to 0.74, P < 0.0001<br><br>With enhanced-communication training compared to traditional education: RR=0.68, 95% CI 0.5 to 0.89, P=0.003<br><br>Combined training compared to traditional education: RR=0.38, 95% CI 0.25 to 0.55, P < 0.0001 | N/A | <u>Patient enablement:</u><br><br>CRP vs traditional education: SMD=-0.11 (95% CI -0.24 to 0.01)<br><br>Enhanced communication vs. traditional education: SMD=0.07 (95% CI -0.05 to 0.19)<br><br>Combined group vs. traditional education: SMD=-0.01 (95% CI -0.13 to 0.11)<br><br><u>Satisfaction with consultation:</u><br><br>CRP vs. traditional education: SMD=-0.09 (95% CI -0.22 to 0.03)<br><br>Enhanced communication vs. education: | 10% cost reduction with online training compared to traditional education if the cost of antibiotic resistance was accounted for [€ 83.21 vs € 92.46]. | <b>Clinical practice improvement:</b><br><br>Online digital education > traditional education<br><br><b>Patient-related outcomes:</b><br>Online digital educations ≥ traditional education (usual care)<br><br><b>Economic outcome(s):</b><br>Online based communication skills training was more cost-effective than traditional education |

|  |  |  |  |  |  |  |                                                                                                                                                                                                                                                                                                                                                                                                                                    |  |  |
|--|--|--|--|--|--|--|------------------------------------------------------------------------------------------------------------------------------------------------------------------------------------------------------------------------------------------------------------------------------------------------------------------------------------------------------------------------------------------------------------------------------------|--|--|
|  |  |  |  |  |  |  | <p>SMD=0.12 (95% CI -0.01 to 0.24)</p> <p>Combined group vs. traditional education: SMD=0.05 (95% CI -0.08 to 0.17)</p> <p><u>Taking antibiotics can do more harm than good:</u></p> <p>CRP vs. traditional education: SMD=0.13 (95% CI 0.01 to 0.26)</p> <p>Enhanced communication vs. traditional education: SMD=0.11 (95% CI -0.01 to 0.24)</p> <p>Combined group vs. traditional education: SMD=0.14 (95% CI 0.02 to 0.26)</p> |  |  |
|--|--|--|--|--|--|--|------------------------------------------------------------------------------------------------------------------------------------------------------------------------------------------------------------------------------------------------------------------------------------------------------------------------------------------------------------------------------------------------------------------------------------|--|--|

\*Pooled estimate on physical and mental scales.  
Abbreviations: I=Intervention, C=Control group, CRP= C Reactive Protein, N/A=Not Available, RCT=Randomized Control Trial, cRCT=cluster RCT, SMD=Standardized Mean Difference, CI=Confidence Interval, RR=Risk Ratio, CME=Continuing Medical Education, MCQ=Multiple Choice Question, UK=United Kingdom, USA=United States of America
